# Supplementary material
Source: HighWire-hosted journal article supplement (https://bmjopen.bmj.com/content/14/5/e080128)
Supplement: inline-supplementary-material-1 [file inline-supplementary-material-1.pdf]

**Supplemental Table 1. Clinical management of in women attending general practice during the first or any encounter within the same treatment episode for lactational mastitis according to calendar year, Australia 2011 to 2022**

|                            | 2011             | 2012             | 2013             | 2014             | 2015             | 2016             | 2017             | 2018             | 2019             | 2020             | 2021             | 2022†          | Total             |
|----------------------------|------------------|------------------|------------------|------------------|------------------|------------------|------------------|------------------|------------------|------------------|------------------|----------------|-------------------|
| <b>N</b>                   | 1 628            | 1 820            | 2 123            | 2 012            | 2 268            | 2 365            | 2 276            | 2 381            | 2 393            | 2 330            | 2 329            | 1 077          | 25 002            |
| <b>Oral antibiotic</b>     |                  |                  |                  |                  |                  |                  |                  |                  |                  |                  |                  |                |                   |
| First                      | 1 465<br>(90.0%) | 1 652<br>(90.8%) | 1 942<br>(91.5%) | 1 850<br>(92.0%) | 2 028<br>(89.4%) | 2 130<br>(90.1%) | 2 011<br>(88.4%) | 2 133<br>(89.6%) | 2 143<br>(89.6%) | 2 079<br>(89.2%) | 2 103<br>(90.3%) | 987<br>(91.6%) | 22 523<br>(90.1%) |
| Any                        | 1 483<br>(91.1%) | 1 673<br>(91.9%) | 1 960<br>(92.3%) | 1 861<br>(92.5%) | 2 041<br>(90.0%) | 2 142<br>(90.6%) | 2 036<br>(89.5%) | 2 158<br>(90.6%) | 2 162<br>(90.3%) | 2 101<br>(90.2%) | 2 126<br>(91.3%) | 996<br>(92.5%) | 22 739<br>(90.9%) |
| <b>Breast ultrasound</b>   |                  |                  |                  |                  |                  |                  |                  |                  |                  |                  |                  |                |                   |
| First                      | 45<br>(2.8%)     | 45<br>(2.5%)     | 76<br>(3.6%)     | 107<br>(5.3%)    | 103<br>(4.5%)    | 139<br>(5.9%)    | 147<br>(6.5%)    | 159<br>(6.7%)    | 196<br>(8.2%)    | 132<br>(5.7%)    | 169<br>(7.3%)    | 75<br>(7.0%)   | 1393<br>(5.6%)    |
| Any                        | 56<br>(3.4%)     | 66<br>(3.6%)     | 99<br>(4.7%)     | 127<br>(6.3%)    | 137<br>(6.0%)    | 171<br>(7.2%)    | 185<br>(8.1%)    | 211<br>(8.9%)    | 233<br>(9.7%)    | 183<br>(7.9%)    | 211<br>(9.1%)    | 92<br>(8.5%)   | 1771<br>(7.1%)    |
| <b>Breast milk culture</b> |                  |                  |                  |                  |                  |                  |                  |                  |                  |                  |                  |                |                   |
| First                      | 11<br>(0.7%)     | 11<br>(0.6%)     | 10<br>(0.5%)     | 8<br>(0.4%)      | 13<br>(0.6%)     | 18<br>(0.8%)     | 10<br>(0.4%)     | 26<br>(1.1%)     | 25<br>(1.0%)     | 21<br>(0.9%)     | 31<br>(1.3%)     | 11<br>(1.0%)   | 195<br>(0.8%)     |
| Any                        | 13<br>(0.8%)     | 15<br>(0.8%)     | 11<br>(0.5%)     | 14<br>(0.7%)     | 16<br>(0.7%)     | 20<br>(0.8%)     | 11<br>(0.5%)     | 29<br>(1.2%)     | 26<br>(1.1%)     | 25<br>(1.1%)     | 40<br>(1.7%)     | 15<br>(1.4%)   | 235<br>(0.9%)     |
| <b>Nipple swab culture</b> |                  |                  |                  |                  |                  |                  |                  |                  |                  |                  |                  |                |                   |
| First                      | 8<br>(0.5%)      | 13<br>(0.7%)     | 13<br>(0.6%)     | 24<br>(1.2%)     | 26<br>(1.1%)     | 17<br>(0.7%)     | 23<br>(1.0%)     | 30<br>(1.3%)     | 18<br>(0.8%)     | 22<br>(0.9%)     | 26<br>(1.1%)     | 17<br>(1.6%)   | 237<br>(0.9%)     |
| Any                        | 8<br>(0.5%)      | 16<br>(0.9%)     | 13<br>(0.6%)     | 26<br>(1.3%)     | 32<br>(1.4%)     | 24<br>(1.0%)     | 27<br>(1.2%)     | 34<br>(1.4%)     | 25<br>(1.0%)     | 28<br>(1.2%)     | 32<br>(1.4%)     | 18<br>(1.7%)   | 283<br>(1.1%)     |
| <b>Blood test‡</b>         |                  |                  |                  |                  |                  |                  |                  |                  |                  |                  |                  |                |                   |
| First                      | 41<br>(2.5%)     | 27<br>(1.5%)     | 64<br>(3.0%)     | 49<br>(2.4%)     | 62<br>(2.7%)     | 84<br>(3.6%)     | 69<br>(3.0%)     | 88<br>(3.7%)     | 117<br>(4.9%)    | 82<br>(3.5%)     | 104<br>(4.5%)    | 48<br>(4.5%)   | 835<br>(3.3%)     |
| Any                        | 43<br>(2.6%)     | 31<br>(1.7%)     | 75<br>(3.5%)     | 56<br>(2.8%)     | 76<br>(3.4%)     | 92<br>(3.9%)     | 86<br>(3.8%)     | 99<br>(4.2%)     | 135<br>(5.6%)    | 96<br>(4.1%)     | 117<br>(5.0%)    | 56<br>(5.2%)   | 962<br>(3.8%)     |
| <b>Breast aspirate</b>     |                  |                  |                  |                  |                  |                  |                  |                  |                  |                  |                  |                |                   |
| First                      | NR               | NR               | NR               | NR               | NR               | NR               | 5<br>(0.2%)      | 9<br>(0.4%)      | NR               | 6<br>(0.3%)      | 5<br>(0.2%)      | NR             | 37<br>(0.1%)      |
| Any                        | NR               | NR               | NR               | NR               | 7<br>(0.3%)      | NR               | 8<br>(0.4%)      | 10<br>(0.4%)     | NR               | 11<br>(0.5%)     | 9<br>(0.4%)      | NR             | 64<br>(0.3%)      |

NR, not reportable due to small cell size

† 2022 calendar year includes January to July data only

‡ Includes ordering of full blood count, c-reactive protein, or erythrocyte sedimentation rate

**Supplemental Table 2. The proportion of women attending general practice who were prescribed oral antibiotics during the first or any encounter within the same treatment episode for lactational mastitis according to antibiotic type and calendar year, Australia 2011 to 2022**

|                                    | 2011           | 2012           | 2013            | 2014           | 2015            | 2016            | 2017            | 2018            | 2019            | 2020            | 2021            | 2022†          |
|------------------------------------|----------------|----------------|-----------------|----------------|-----------------|-----------------|-----------------|-----------------|-----------------|-----------------|-----------------|----------------|
| <b>N</b>                           | 1 628          | 1 820          | 2 123           | 2 012          | 2 268           | 2 365           | 2 276           | 2 381           | 2 393           | 2 330           | 2 329           | 1 077          |
| <b>Di/flucloxacillin</b>           |                |                |                 |                |                 |                 |                 |                 |                 |                 |                 |                |
| <b>First</b>                       | 719<br>(44.2%) | 816<br>(44.8%) | 981<br>(46.2%)  | 922<br>(45.8%) | 1038<br>(45.8%) | 1142<br>(48.3%) | 1098<br>(48.2%) | 1273<br>(53.5%) | 1244<br>(52.0%) | 1263<br>(54.2%) | 1340<br>(57.5%) | 641<br>(59.5%) |
| <b>Any*</b>                        | 751<br>(46.1%) | 830<br>(45.6%) | 1010<br>(47.6%) | 945<br>(47.0%) | 1068<br>(47.1%) | 1172<br>(49.6%) | 1130<br>(49.6%) | 1310<br>(55.0%) | 1264<br>(52.8%) | 1292<br>(55.5%) | 1371<br>(58.9%) | 651<br>(60.4%) |
| <b>Cefalexin</b>                   |                |                |                 |                |                 |                 |                 |                 |                 |                 |                 |                |
| <b>First</b>                       | 607<br>(37.3%) | 678<br>(37.3%) | 775<br>(36.5%)  | 765<br>(38.0%) | 780<br>(34.4%)  | 825<br>(34.9%)  | 737<br>(32.4%)  | 690<br>(29.0%)  | 782<br>(32.7%)  | 684<br>(29.4%)  | 626<br>(26.9%)  | 274<br>(25.4%) |
| <b>Any*</b>                        | 629<br>(38.6%) | 704<br>(38.7%) | 800<br>(37.7%)  | 780<br>(38.8%) | 804<br>(35.4%)  | 850<br>(35.9%)  | 765<br>(33.6%)  | 714<br>(30.0%)  | 805<br>(33.6%)  | 713<br>(30.6%)  | 652<br>(28.0%)  | 285<br>(26.5%) |
| <b>Amoxicillin</b>                 |                |                |                 |                |                 |                 |                 |                 |                 |                 |                 |                |
| <b>First</b>                       | 65<br>(4.0%)   | 93<br>(5.1%)   | 84<br>(4.0%)    | 57<br>(2.8%)   | 95<br>(4.2%)    | 75<br>(3.2%)    | 72<br>(3.2%)    | 59<br>(2.5%)    | 40<br>(1.7%)    | 38<br>(1.6%)    | 53<br>(2.3%)    | 23<br>(2.1%)   |
| <b>Any*</b>                        | 68<br>(4.2%)   | 94<br>(5.2%)   | 86<br>(4.1%)    | 59<br>(2.9%)   | 96<br>(4.2%)    | 77<br>(3.3%)    | 74<br>(3.3%)    | 62<br>(2.6%)    | 40<br>(1.7%)    | 38<br>(1.6%)    | 55<br>(2.4%)    | 23<br>(2.1%)   |
| <b>Amoxicillin and clavulanate</b> |                |                |                 |                |                 |                 |                 |                 |                 |                 |                 |                |
| <b>First</b>                       | 28<br>(1.7%)   | 27<br>(1.5%)   | 63<br>(3.0%)    | 48<br>(2.4%)   | 48<br>(2.1%)    | 54<br>(2.3%)    | 64<br>(2.8%)    | 72<br>(3.0%)    | 71<br>(3.0%)    | 43<br>(1.8%)    | 48<br>(2.1%)    | 28<br>(2.6%)   |
| <b>Any*</b>                        | 29<br>(1.8%)   | 32<br>(1.8%)   | 69<br>(3.3%)    | 54<br>(2.7%)   | 59<br>(2.6%)    | 63<br>(2.7%)    | 71<br>(3.1%)    | 81<br>(3.4%)    | 74<br>(3.1%)    | 48<br>(2.1%)    | 53<br>(2.3%)    | 31<br>(2.9%)   |
| <b>Erythromycin</b>                |                |                |                 |                |                 |                 |                 |                 |                 |                 |                 |                |
| <b>First</b>                       | 22<br>(1.4%)   | 27<br>(1.5%)   | 34<br>(1.6%)    | 43<br>(2.1%)   | 34<br>(1.5%)    | 34<br>(1.4%)    | 23<br>(1.0%)    | 22<br>(0.9%)    | 21<br>(0.9%)    | 17<br>(0.7%)    | 5<br>(0.2%)     | 7<br>(0.6%)    |
| <b>Any*</b>                        | 23<br>(1.4%)   | 30<br>(1.6%)   | 39<br>(1.8%)    | 44<br>(2.2%)   | 35<br>(1.5%)    | 35<br>(1.5%)    | 26<br>(1.1%)    | 24<br>(1.0%)    | 23<br>(1.0%)    | 17<br>(0.7%)    | 5<br>(0.2%)     | 7<br>(0.6%)    |
| <b>Clindamycin</b>                 |                |                |                 |                |                 |                 |                 |                 |                 |                 |                 |                |
| <b>First</b>                       | 21<br>(1.3%)   | 20<br>(1.1%)   | 20<br>(0.9%)    | 22<br>(1.1%)   | 34<br>(1.5%)    | 23<br>(1.0%)    | 28<br>(1.2%)    | 28<br>(1.2%)    | 26<br>(1.1%)    | 43<br>(1.8%)    | 32<br>(1.4%)    | 18<br>(1.7%)   |
| <b>Any*</b>                        | 22<br>(1.4%)   | 22<br>(1.2%)   | 23<br>(1.1%)    | 23<br>(1.1%)   | 39<br>(1.7%)    | 28<br>(1.2%)    | 32<br>(1.4%)    | 30<br>(1.3%)    | 28<br>(1.2%)    | 49<br>(2.1%)    | 38<br>(1.6%)    | 20<br>(1.9%)   |
| <b>Other</b>                       |                |                |                 |                |                 |                 |                 |                 |                 |                 |                 |                |
| <b>First</b>                       | 20<br>(1.2%)   | 17<br>(0.9%)   | 19<br>(0.9%)    | 20<br>(1.0%)   | 19<br>(0.8%)    | 11<br>(0.5%)    | 15<br>(0.7%)    | 8<br>(0.3%)     | 14<br>(0.6%)    | 11<br>(0.5%)    | 13<br>(0.6%)    | 7<br>(0.6%)    |
| <b>Any*</b>                        | 22<br>(1.4%)   | 25<br>(1.4%)   | 25<br>(1.2%)    | 23<br>(1.1%)   | 22<br>(1.0%)    | 14<br>(0.6%)    | 16<br>(0.7%)    | 12<br>(0.5%)    | 19<br>(0.8%)    | 15<br>(0.6%)    | 15<br>(0.6%)    | 7<br>(0.6%)    |

\*at any encounter for mastitis, including additional encounter occurring within two week period of a previous mastitis encounter

† 2022 calendar year includes January to July data only

**Supplemental Table 3. The proportion of women attending general practice for lactational mastitis who received selected clinical investigations or prescribed medications according to whether or not they were prescribed oral antibiotics during the same encounter, Australia 2011 to 2022**

|                                 | Antibiotics prescribed at first encounter |                     | p-value |
|---------------------------------|-------------------------------------------|---------------------|---------|
|                                 | No<br>(N = 2 479)                         | Yes<br>(N = 22 523) |         |
| <b>Clinical Investigations</b>  |                                           |                     |         |
| Breast ultrasound               | 174 (7.0%)                                | 1 219 (5.4%)        | <0.001  |
| Breast milk culture             | 26 (1.0%)                                 | 169 (0.8%)          | 0.109   |
| Nipple swab culture             | 28 (1.1%)                                 | 209 (0.9%)          | 0.326   |
| Blood Test                      | 109 (4.4%)                                | 726 (3.2%)          | 0.002   |
| Breast Aspirate                 | 8 (0.3%)                                  | 29 (0.1%)           | 0.017   |
| <b>Medication Prescriptions</b> |                                           |                     |         |
| Antibiotics                     |                                           |                     |         |
| Topical                         | 25 (1.0%)                                 | 100 (0.4%)          | <0.001  |
| Intravenous                     | 8 (0.3%)                                  | 12 (0.1%)           | <0.001  |
| Antifungals                     |                                           |                     |         |
| Oral                            | 97 (3.9%)                                 | 178 (0.8%)          | <0.001  |
| Topical                         | 53 (2.1%)                                 | 250 (1.1%)          | <0.001  |
| <b>Other Medications</b>        |                                           |                     |         |
| Lactation Suppressant           | 26 (1.0%)                                 | 244 (1.1%)          | 0.875   |
| Lactation Stimulant             | 30 (1.2%)                                 | 226 (1.0%)          | 0.332   |

**Supplemental Table 4. Proportion of women attending general practice who received a breast ultrasound during the first, or any, encounter for lactational mastitis according to individual and practice-level characteristics, Australia 2011 to 2022**

| Category                              | First                  |                   | Any*                   |                   |
|---------------------------------------|------------------------|-------------------|------------------------|-------------------|
|                                       | Proportion<br>(95% CI) | OR<br>(95% CI)    | Proportion<br>(95% CI) | OR<br>(95% CI)    |
| <b>Age group</b>                      |                        |                   |                        |                   |
| 18-24                                 | 4.4 (3.6, 5.4)         | 0.97 (0.76, 1.25) | 5.2 (4.3, 6.3)         | 0.88 (0.71, 1.11) |
| 25-29                                 | 4.5 (4.0, 5.1)         | Reference         | 5.9 (5.3, 6.5)         | Reference         |
| 30-34                                 | 5.6 (5.2, 6.1)         | 1.25 (1.08, 1.46) | 7.2 (6.7, 7.7)         | 1.24 (1.08, 1.41) |
| 35-39                                 | 6.5 (5.9, 7.1)         | 1.46 (1.24, 1.71) | 8.2 (7.5, 8.9)         | 1.43 (1.24, 1.65) |
| 40-44                                 | 7.4 (6.1, 8.9)         | 1.68 (1.34, 2.12) | 9.5 (8.1, 11.1)        | 1.69 (1.37, 2.07) |
| <b>Concession status</b>              |                        |                   |                        |                   |
| No concession                         | 5.5 (5.2, 5.8)         | Reference         | 7.1 (6.8, 7.5)         | Reference         |
| Concession holder                     | 5.8 (5.1, 6.6)         | 1.05 (0.91, 1.22) | 6.8 (6.1, 7.7)         | 0.96 (0.84, 1.09) |
| <b>Smoking status</b>                 |                        |                   |                        |                   |
| Current smoker                        | 7.9 (6.2, 10.0)        | 1.44 (1.11, 1.88) | 9.4 (7.5, 11.6)        | 1.30 (1.02, 1.66) |
| Ex-smoker                             | 5.2 (4.7, 5.7)         | 0.91 (0.81, 1.03) | 6.3 (5.8, 6.8)         | 0.84 (0.76, 0.94) |
| Never smoker                          | 5.6 (5.3, 6.0)         | Reference         | 7.4 (7.0, 7.8)         | Reference         |
| <b>Patient SES</b>                    |                        |                   |                        |                   |
| Very low                              | 5.2 (4.5, 6.1)         | 0.91 (0.75, 1.09) | 6.3 (5.5, 7.2)         | 0.82 (0.69, 0.97) |
| Low                                   | 5.3 (4.6, 6.0)         | 0.92 (0.78, 1.09) | 6.6 (5.9, 7.4)         | 0.87 (0.74, 1.01) |
| Middle                                | 5.3 (4.7, 6.0)         | 0.93 (0.79, 1.08) | 6.7 (6.0, 7.4)         | 0.87 (0.76, 1.01) |
| High                                  | 6.0 (5.4, 6.6)         | 1.05 (0.90, 1.22) | 7.6 (6.9, 8.3)         | 1.00 (0.88, 1.15) |
| Very high                             | 5.7 (5.2, 6.3)         | Reference         | 7.6 (7.0, 8.2)         | Reference         |
| <b>Indigenous status</b>              |                        |                   |                        |                   |
| Aboriginal and/or TSI                 | 5.7 (3.9, 7.9)         | 1.02 (0.71, 1.47) | 6.6 (4.7, 9.0)         | 0.92 (0.66, 1.30) |
| Neither Aboriginal or TSI             | 5.6 (5.3, 5.9)         | Reference         | 7.1 (6.8, 7.4)         | Reference         |
| <b>Fever</b>                          |                        |                   |                        |                   |
| No                                    | 6.5 (5.9, 7.1)         | Reference         | 8.3 (7.6, 9.0)         | Reference         |
| Yes                                   | 3.0 (1.6, 5.2)         | 0.45 (0.25, 0.80) | 5.5 (3.5, 8.2)         | 0.64 (0.41, 1.00) |
| Not Documented                        | 5.3 (5.0, 5.6)         | 0.81 (0.72, 0.91) | 6.7 (6.3, 7.1)         | 0.79 (0.71, 0.88) |
| <b>Remoteness of general practice</b> |                        |                   |                        |                   |
| Major City                            | 5.7 (5.4, 6.1)         | Reference         | 7.4 (7.0, 7.8)         | Reference         |
| Inner/Outer Regional                  | 5.0 (4.5, 5.7)         | 0.87 (0.75, 1.00) | 6.4 (5.8, 7.1)         | 0.86 (0.76, 0.97) |
| Remote/Very Remote                    | 5.5 (4.7, 6.3)         | 0.95 (0.80, 1.12) | 6.5 (5.6, 7.4)         | 0.87 (0.75, 1.01) |

\*at any encounter for mastitis, including additional encounter occurring within two week period of a previous mastitis encounter

Abbreviations: OR, odds ratio; SES, socioeconomic status; TSI, Torres Strait Islander

**Supplemental Table 5. Proportion of women attending general practice who received a blood test (FBE, CRP, or ESR) during the first, or any, encounter for lactational mastitis according to individual and practice-level characteristics, Australia 2011 to 2022**

| Category                              | First<br>Proportion<br>(95% CI) | OR<br>(95% CI)    | Any*<br>Proportion<br>(95% CI) | OR<br>(95% CI)    |
|---------------------------------------|---------------------------------|-------------------|--------------------------------|-------------------|
| <b>Age group</b>                      |                                 |                   |                                |                   |
| 18-24                                 | 4.0 (3.2, 4.9)                  | 1.30 (1.00, 1.71) | 4.6 (3.7, 5.6)                 | 1.30 (1.01, 1.67) |
| 25-29                                 | 3.1 (2.6, 3.5)                  | Reference         | 3.6 (3.1, 4.1)                 | Reference         |
| 30-34                                 | 3.4 (3.0, 3.7)                  | 1.10 (0.92, 1.32) | 3.8 (3.4, 4.2)                 | 1.06 (0.89, 1.26) |
| 35-39                                 | 3.2 (2.8, 3.7)                  | 1.04 (0.84, 1.28) | 3.7 (3.2, 4.2)                 | 1.02 (0.84, 1.23) |
| 40-44                                 | 4.0 (3.0, 5.1)                  | 1.31 (0.97, 1.77) | 4.7 (3.7, 5.9)                 | 1.33 (1.01, 1.75) |
| <b>Concession status</b>              |                                 |                   |                                |                   |
| No concession                         | 3.2 (2.9, 3.4)                  | Reference         | 3.7 (3.4, 3.9)                 | Reference         |
| Concession holder                     | 4.3 (3.7, 5.0)                  | 1.37 (1.15, 1.63) | 4.8 (4.1, 5.5)                 | 1.31 (1.11, 1.54) |
| <b>Smoking status</b>                 |                                 |                   |                                |                   |
| Current Smoker                        | 4.0 (2.7, 5.5)                  | 1.21 (0.84, 1.74) | 4.5 (3.1, 6.1)                 | 1.14 (0.81, 1.61) |
| Ex Smoker                             | 3.4 (3.0, 3.8)                  | 1.02 (0.88, 1.18) | 3.7 (3.3, 4.1)                 | 0.93 (0.81, 1.07) |
| Never Smoker                          | 3.3 (3.0, 3.6)                  | Reference         | 3.9 (3.6, 4.3)                 | Reference         |
| <b>Patient SES</b>                    |                                 |                   |                                |                   |
| Very Low                              | 3.5 (2.9, 4.2)                  | 1.07 (0.85, 1.35) | 3.8 (3.1, 4.5)                 | 0.99 (0.79, 1.23) |
| Low                                   | 3.5 (3.0, 4.1)                  | 1.08 (0.88, 1.34) | 4.2 (3.6, 4.9)                 | 1.11 (0.92, 1.35) |
| Middle                                | 3.4 (2.9, 4.0)                  | 1.05 (0.86, 1.28) | 3.8 (3.3, 4.4)                 | 1.00 (0.83, 1.21) |
| High                                  | 3.1 (2.7, 3.6)                  | 0.95 (0.78, 1.17) | 3.7 (3.2, 4.2)                 | 0.97 (0.81, 1.17) |
| Very High                             | 3.3 (2.9, 3.7)                  | Reference         | 3.8 (3.4, 4.3)                 | Reference         |
| <b>Indigenous status</b>              |                                 |                   |                                |                   |
| Aboriginal and/or TSI                 | 4.6 (3.0, 6.7)                  | 1.40 (0.93, 2.10) | 5.1 (3.4, 7.3)                 | 1.36 (0.92, 2.00) |
| Neither Aboriginal or TSI             | 3.3 (3.1, 3.5)                  | Reference         | 3.8 (3.6, 4.1)                 | Reference         |
| <b>Fever</b>                          |                                 |                   |                                |                   |
| No                                    | 3.9 (3.5, 4.4)                  | Reference         | 4.5 (4.0, 5.0)                 | Reference         |
| Yes                                   | 2.5 (1.2, 4.5)                  | 0.63 (0.33, 1.19) | 3.0 (1.6, 5.2)                 | 0.66 (0.37, 1.18) |
| Not Documented                        | 3.2 (2.9, 3.4)                  | 0.80 (0.69, 0.93) | 3.6 (3.4, 3.9)                 | 0.81 (0.70, 0.93) |
| <b>Remoteness of general practice</b> |                                 |                   |                                |                   |
| Major City                            | 3.4 (3.1, 3.7)                  | Reference         | 3.9 (3.7, 4.3)                 | Reference         |
| Inner/Outer                           | 3.1 (2.6, 3.6)                  | 0.90 (0.75, 1.08) | 3.6 (3.1, 4.2)                 | 0.91 (0.77, 1.07) |
| Regional                              |                                 |                   |                                |                   |
| Remote/Very Remote                    | 3.2 (2.6, 3.9)                  | 0.95 (0.76, 1.17) | 3.6 (3.0, 4.3)                 | 0.92 (0.75, 1.12) |

\*at any encounter for mastitis, including additional encounter occurring within two week period of a previous mastitis encounter

Abbreviations: OR, odds ratio; SES, socioeconomic status; TSI, Torres Strait Islander

**Supplemental Table 6. Proportion of women attending general practice who received a breast milk culture during the first, or any, encounter for lactational mastitis according to individual and practice-level characteristics, Australia 2011 to 2022**

| Category                              | Proportion<br>(95% CI) | First<br>OR<br>(95% CI) | Any*<br>Proportion<br>(95% CI) | OR<br>(95% CI)    |
|---------------------------------------|------------------------|-------------------------|--------------------------------|-------------------|
| <b>Age group</b>                      |                        |                         |                                |                   |
| 18-24                                 | 0.8 (0.5, 1.3)         | 0.78 (0.45, 1.36)       | 1.0 (0.6, 1.5)                 | 0.83 (0.51, 1.38) |
| 25-29                                 | 1.0 (0.8, 1.3)         | Reference               | 1.2 (0.9, 1.5)                 | Reference         |
| 30-34                                 | 0.9 (0.8, 1.1)         | 0.91 (0.66, 1.26)       | 1.1 (0.9, 1.3)                 | 0.91 (0.67, 1.23) |
| 35-39                                 | 0.8 (0.6, 1.1)         | 0.77 (0.53, 1.13)       | 1.0 (0.8, 1.3)                 | 0.85 (0.60, 1.20) |
| 40-44                                 | 1.5 (0.9, 2.3)         | 1.47 (0.90, 2.41)       | 1.8 (1.2, 2.6)                 | 1.49 (0.95, 2.35) |
| <b>Concession status</b>              |                        |                         |                                |                   |
| No concession                         | 1.0 (0.8, 1.1)         | Reference               | 1.1 (1.0, 1.3)                 | Reference         |
| Concession holder                     | 0.9 (0.6, 1.2)         | 0.91 (0.63, 1.31)       | 1.1 (0.8, 1.4)                 | 0.92 (0.66, 1.28) |
| <b>Smoking Status</b>                 |                        |                         |                                |                   |
| Current Smoker                        | 1.4 (0.7, 2.4)         | 1.41 (0.76, 2.63)       | 1.4 (0.7, 2.4)                 | 1.15 (0.62, 2.13) |
| Ex Smoker                             | 0.9 (0.7, 1.1)         | 0.89 (0.67, 1.19)       | 1.0 (0.8, 1.2)                 | 0.83 (0.64, 1.08) |
| Never Smoker                          | 1.0 (0.8, 1.1)         | Reference               | 1.2 (1.0, 1.4)                 | Reference         |
| <b>Patient SES</b>                    |                        |                         |                                |                   |
| Very Low                              | 1.0 (0.7, 1.4)         | 0.90 (0.59, 1.36)       | 1.3 (0.9, 1.8)                 | 1.03 (0.71, 1.50) |
| Low                                   | 0.7 (0.5, 1.0)         | 0.62 (0.41, 0.95)       | 0.8 (0.6, 1.2)                 | 0.65 (0.44, 0.97) |
| Middle                                | 0.8 (0.6, 1.1)         | 0.72 (0.49, 1.05)       | 1.1 (0.8, 1.4)                 | 0.86 (0.61, 1.20) |
| High                                  | 0.9 (0.7, 1.2)         | 0.83 (0.58, 1.18)       | 1.1 (0.8, 1.4)                 | 0.87 (0.63, 1.21) |
| Very High                             | 1.1 (0.9, 1.4)         | Reference               | 1.3 (1.0, 1.6)                 | Reference         |
| <b>Indigenous Status</b>              |                        |                         |                                |                   |
| Aboriginal and/or TSI                 | 0.9 (0.3, 2.1)         | 0.96 (0.40, 2.35)       | 0.9 (0.3, 2.1)                 | 0.80 (0.33, 1.95) |
| Neither Aboriginal or TSI             | 0.9 (0.8, 1.1)         | Reference               | 1.1 (1.0, 1.3)                 | Reference         |
| <b>Fever</b>                          |                        |                         |                                |                   |
| No                                    | 1.1 (0.9, 1.4)         | Reference               | 1.3 (1.1, 1.6)                 | Reference         |
| Yes                                   | 0.2 (0.0, 1.4)         | 0.22 (0.03, 1.60)       | 0.5 (0.1, 1.8)                 | 0.37 (0.09, 1.52) |
| Not Documented                        | 0.9 (0.8, 1.1)         | 0.81 (0.61, 1.07)       | 1.1 (0.9, 1.2)                 | 0.81 (0.63, 1.04) |
| <b>Remoteness of general practice</b> |                        |                         |                                |                   |
| Major City                            | 0.9 (0.8, 1.1)         | Reference               | 1.1 (1.0, 1.3)                 | Reference         |
| Inner/Outer                           | 0.7 (0.5, 0.9)         | 0.71 (0.49, 1.03)       | 0.9 (0.6, 1.2)                 | 0.77 (0.56, 1.07) |
| Regional                              |                        |                         |                                |                   |
| Remote/Very Remote                    | 1.4 (1.0, 1.9)         | 1.48 (1.05, 2.07)       | 1.6 (1.2, 2.1)                 | 1.44 (1.05, 1.98) |

\*at any encounter for mastitis, including additional encounter occurring within two week period of a previous mastitis encounter

Abbreviations: OR, odds ratio; SES, socioeconomic status; TSI, Torres Strait Islander

**Supplemental Table 7. Proportion of women attending general practice who received a nipple swab culture during the first, or any, encounter for lactational mastitis according to individual and practice-level characteristics, Australia 2011 to 2022**

| Category                              | Proportion<br>(95% CI) | First<br>OR<br>(95% CI) | Any*<br>Proportion<br>(95% CI) | OR<br>(95% CI)    |
|---------------------------------------|------------------------|-------------------------|--------------------------------|-------------------|
| <b>Age group</b>                      |                        |                         |                                |                   |
| 18-24                                 | 0.7 (0.4, 1.2)         | 0.84 (0.46, 1.52)       | 0.9 (0.5, 1.4)                 | 0.87 (0.51, 1.50) |
| 25-29                                 | 0.8 (0.6, 1.1)         | Reference               | 1.0 (0.7, 1.3)                 | Reference         |
| 30-34                                 | 0.9 (0.7, 1.1)         | 1.04 (0.73, 1.48)       | 1.0 (0.8, 1.2)                 | 1.04 (0.75, 1.44) |
| 35-39                                 | 0.6 (0.4, 0.9)         | 0.74 (0.49, 1.14)       | 0.8 (0.6, 1.1)                 | 0.81 (0.55, 1.20) |
| 40-44                                 | 0.6 (0.3, 1.2)         | 0.73 (0.36, 1.49)       | 1.0 (0.5, 1.6)                 | 0.98 (0.54, 1.76) |
| <b>Concession status</b>              |                        |                         |                                |                   |
| No concession                         | 0.8 (0.7, 1.0)         | Reference               | 1.0 (0.9, 1.1)                 | Reference         |
| Concession holder                     | 0.5 (0.3, 0.8)         | 0.58 (0.36, 0.94)       | 0.6 (0.4, 0.9)                 | 0.61 (0.40, 0.94) |
| <b>Smoking Status</b>                 |                        |                         |                                |                   |
| Current Smoker                        | 0.1 (0.0, 0.7)         | 0.14 (0.02, 0.98)       | 0.1 (0.0, 0.7)                 | 0.11 (0.02, 0.81) |
| Ex Smoker                             | 0.6 (0.5, 0.8)         | 0.68 (0.49, 0.94)       | 0.7 (0.6, 0.9)                 | 0.67 (0.50, 0.90) |
| Never Smoker                          | 0.9 (0.7, 1.1)         | Reference               | 1.1 (0.9, 1.3)                 | Reference         |
| <b>Patient SES</b>                    |                        |                         |                                |                   |
| Very Low                              | 0.4 (0.2, 0.7)         | 0.59 (0.33, 1.06)       | 0.6 (0.4, 0.9)                 | 0.59 (0.36, 0.98) |
| Low                                   | 1.0 (0.7, 1.3)         | 1.32 (0.88, 1.99)       | 1.1 (0.8, 1.5)                 | 1.07 (0.74, 1.56) |
| Middle                                | 0.8 (0.6, 1.1)         | 1.08 (0.72, 1.62)       | 1.0 (0.7, 1.3)                 | 0.95 (0.66, 1.37) |
| High                                  | 0.7 (0.5, 1.0)         | 0.96 (0.63, 1.44)       | 0.8 (0.6, 1.1)                 | 0.80 (0.55, 1.16) |
| Very High                             | 0.8 (0.6, 1.0)         | Reference               | 1.0 (0.8, 1.3)                 | Reference         |
| <b>Indigenous Status</b>              |                        |                         |                                |                   |
| Aboriginal and/or TSI                 | 0.5 (0.1, 1.6)         | 0.70 (0.22, 2.19)       | 0.5 (0.1, 1.6)                 | 0.58 (0.18, 1.80) |
| Neither Aboriginal or TSI             | 0.8 (0.7, 0.9)         | Reference               | 0.9 (0.8, 1.1)                 | Reference         |
| <b>Fever</b>                          |                        |                         |                                |                   |
| No                                    | 0.8 (0.6, 1.1)         | Reference               | 1.0 (0.8, 1.3)                 | Reference         |
| Yes                                   | 0.7 (0.2, 2.2)         | 0.89 (0.28, 2.86)       | 1.0 (0.3, 2.5)                 | 0.98 (0.35, 2.69) |
| Not Documented                        | 0.8 (0.6, 0.9)         | 0.90 (0.66, 1.24)       | 0.9 (0.8, 1.1)                 | 0.89 (0.67, 1.18) |
| <b>Remoteness of general practice</b> |                        |                         |                                |                   |
| Major City                            | 0.8 (0.6, 0.9)         | Reference               | 0.9 (0.8, 1.1)                 | Reference         |
| Inner/Outer                           | 0.3 (0.2, 0.5)         | 0.46 (0.28, 0.75)       | 0.5 (0.3, 0.7)                 | 0.53 (0.35, 0.81) |
| Regional                              |                        |                         |                                |                   |
| Remote/Very Remote                    | 1.3 (0.9, 1.8)         | 1.76 (1.24, 2.52)       | 1.4 (1.0, 1.9)                 | 1.49 (1.06, 2.09) |

\*at any encounter for mastitis, including additional encounter occurring within two week period of a previous mastitis encounter

Abbreviations: OR, odds ratio; SES, socioeconomic status; TSI, Torres Strait Islander

**Supplemental Table 8. Proportion of women attending general practice who received a breast aspirate during the first, or any, encounter for lactational mastitis according to individual and practice-level characteristics, Australia 2011 to 2022**

| Category                              | First<br>Proportion<br>(95% CI) | OR<br>(95% CI)    | Any*<br>Proportion<br>(95% CI) | OR<br>(95% CI)    |
|---------------------------------------|---------------------------------|-------------------|--------------------------------|-------------------|
| <b>Age group</b>                      |                                 |                   |                                |                   |
| 18-24                                 | 0.1 (0.0, 0.3)                  | 0.37 (0.05, 2.93) | 0.1 (0.0, 0.4)                 | 0.53 (0.12, 2.40) |
| 25-29                                 | 0.1 (0.1, 0.3)                  | Reference         | 0.2 (0.1, 0.3)                 | Reference         |
| 30-34                                 | 0.1 (0.1, 0.2)                  | 0.96 (0.40, 2.33) | 0.3 (0.2, 0.4)                 | 1.57 (0.78, 3.14) |
| 35-39                                 | 0.2 (0.1, 0.4)                  | 1.48 (0.61, 3.63) | 0.3 (0.2, 0.5)                 | 1.53 (0.72, 3.27) |
| 40-44                                 | 0.2 (0.0, 0.6)                  | 1.50 (0.40, 5.66) | 0.3 (0.1, 0.8)                 | 1.82 (0.63, 5.24) |
| <b>Concession status</b>              |                                 |                   |                                |                   |
| No concession                         | 0.2 (0.1, 0.2)                  | Reference         | 0.3 (0.2, 0.3)                 | Reference         |
| Concession holder                     | 0.1 (0.0, 0.3)                  | 0.85 (0.33, 2.18) | 0.2 (0.1, 0.4)                 | 0.67 (0.30, 1.46) |
| <b>Smoking status</b>                 |                                 |                   |                                |                   |
| Current Smoker                        | 0.4 (0.1, 1.1)                  | 2.42 (0.72, 8.13) | 0.4 (0.1, 1.1)                 | 1.34 (0.41, 4.33) |
| Ex Smoker                             | 0.1 (0.1, 0.2)                  | 0.75 (0.35, 1.59) | 0.2 (0.1, 0.3)                 | 0.70 (0.40, 1.25) |
| Never Smoker                          | 0.2 (0.1, 0.2)                  | Reference         | 0.3 (0.2, 0.4)                 | Reference         |
| <b>Patient SES</b>                    |                                 |                   |                                |                   |
| Very Low                              | 0.1 (0.0, 0.2)                  | 0.27 (0.06, 1.19) | 0.1 (0.0, 0.2)                 | 0.14 (0.03, 0.57) |
| Low                                   | 0.1 (0.0, 0.3)                  | 0.51 (0.19, 1.39) | 0.2 (0.1, 0.4)                 | 0.41 (0.19, 0.88) |
| Middle                                | 0.1 (0.0, 0.2)                  | 0.33 (0.11, 1.00) | 0.2 (0.1, 0.3)                 | 0.33 (0.15, 0.72) |
| High                                  | 0.2 (0.1, 0.3)                  | 0.78 (0.35, 1.71) | 0.3 (0.1, 0.4)                 | 0.54 (0.29, 1.02) |
| Very High                             | 0.2 (0.1, 0.4)                  | Reference         | 0.5 (0.3, 0.7)                 | Reference         |
| <b>Indigenous status</b>              |                                 |                   |                                |                   |
| Aboriginal and/or TSI                 | 0                               | NR                | 0                              | NR                |
| Neither Aboriginal or TSI             | 0.2 (0.1-0.2)                   | Reference         | 0.3 (0.2-0.3)                  | Reference         |
| <b>Fever</b>                          |                                 |                   |                                |                   |
| No                                    | 0.2 (0.1, 0.3)                  | Reference         | 0.3 (0.2, 0.4)                 | Reference         |
| Yes                                   | 0.0 (0.0, 0.9)                  | NR                | 0.0 (0.0, 0.9)                 | NR                |
| Not Documented                        | 0.1 (0.1, 0.2)                  | 0.98 (0.47, 2.03) | 0.3 (0.2, 0.3)                 | 1.00 (0.58, 1.75) |
| <b>Remoteness of general practice</b> |                                 |                   |                                |                   |
| Major City                            | 0.2 (0.1, 0.2)                  | Reference         | 0.3 (0.2, 0.4)                 | Reference         |
| Inner/Outer                           | 0.1 (0.0, 0.2)                  | 0.56 (0.22, 1.45) | 0.2 (0.1, 0.3)                 | 0.59 (0.29, 1.20) |
| Regional                              |                                 |                   |                                |                   |
| Remote/Very Remote                    | 0.1 (0.0, 0.3)                  | 0.75 (0.26, 2.14) | 0.2 (0.1, 0.5)                 | 0.77 (0.35, 1.70) |

\*at any encounter for mastitis, including additional encounter occurring within two week period of a previous mastitis encounter

Abbreviations: OR, odds ratio; SES, socioeconomic status; TSI, Torres Strait Islander
